# Supplementary material for: Effect of pH, ultrasound frequency and power density on the release of calcein from stealth liposomes
Source: publisher site journal article supplement (doi:10.1515/ejnm-2015-0046), 2016-01-01
Supplement: Supplementary file 1 [file Copy_of_Supplementary_data.pdf › Supplement/Copy_of_Supplementary_data.pdf]

**BATCH #1****6.08 W/cm2****REPLICATE 1****REPLICATE 2**

| Insonation time (min) | average fluorescence | F-F0     | Ftx100-F0 (F-F0)/(Ftx100-F0) |          | average fluorescence | F-F0     | Ftx100-F0 |
|-----------------------|----------------------|----------|------------------------------|----------|----------------------|----------|-----------|
| 0                     | 20.10129695          | 0        | 24.21374                     | 0        | 18.85832             | 0        | 25.50005  |
| 1                     | 22.9341286           | 2.832832 | 24.21374                     | 0.116993 | 20.57087             | 1.712552 | 25.50005  |
| 2                     | 25.30025578          | 5.198959 | 24.21374                     | 0.214711 | 24.25899             | 5.400667 | 25.50005  |
| 3                     | 27.06916177          | 6.967865 | 24.21374                     | 0.287765 | 25.50855             | 6.650229 | 25.50005  |
| 5                     | 30.43555293          | 10.33426 | 24.21374                     | 0.426793 | 30.83404             | 11.97572 | 25.50005  |
| 10                    | 39.56523772          | 19.46394 | 24.21374                     | 0.803839 | 38.54804             | 19.68972 | 25.50005  |
| add Tx100             | 44.31503547          | 24.21374 |                              |          | 44.35837             | 25.50005 |           |

**6.97 W/cm2****REPLICATE 1****REPLICATE 2**

| Insonation time (min) | average fluorescence | F-F0     | Ftx100-F0 (F-F0)/(Ftx100-F0) |          | average fluorescence | F-F0     | Ftx100-F0 |
|-----------------------|----------------------|----------|------------------------------|----------|----------------------|----------|-----------|
| 0                     | 19.49654532          | 0        | 31.19526                     | 0        | 19.36194             | 0        | 31.81569  |
| 1                     | 25.36545484          | 5.86891  | 31.19526                     | 0.188135 | 23.62089             | 4.25895  | 31.81569  |
| 2                     | 28.72129075          | 9.224745 | 31.19526                     | 0.29571  |                      |          | 31.81569  |
| 3                     | 30.88231918          | 11.38577 | 31.19526                     | 0.364984 | 26.73083             | 7.368898 | 31.81569  |
| 5                     | 34.6791302           | 15.18258 | 31.19526                     | 0.486695 | 31.81107             | 12.44914 | 31.81569  |
| 10                    | 43.07741213          | 23.58087 | 31.19526                     | 0.755912 | 41.48694             | 22.12501 | 31.81569  |
| add Tx100             | 50.69180113          | 31.19526 |                              |          | 51.17763             | 31.81569 |           |

**11.83 W/cm2****REPLICATE 1****REPLICATE 2**

| Insonation time (min) | average fluorescence | F-F0     | Ftx100-F0 (F-F0)/(Ftx100-F0) |          | average fluorescence | F-F0     | Ftx100-F0 |
|-----------------------|----------------------|----------|------------------------------|----------|----------------------|----------|-----------|
| 0                     | 21.7970966           | 0        | 30.44479                     | 0        | 20.32231             | 0        | 31.91261  |
| 1                     | 27.35780965          | 5.560713 | 30.44479                     | 0.182649 | 24.03697             | 3.714665 | 31.91261  |
| 2                     | 30.09473929          | 8.297643 | 30.44479                     | 0.272547 | 28.37889             | 8.056584 | 31.91261  |
| 3                     | 34.1252637           | 12.32817 | 30.44479                     | 0.404935 | 32.53537             | 12.21306 | 31.91261  |
| 5                     | 36.84775324          | 15.05066 | 30.44479                     | 0.494359 | 35.64383             | 15.32152 | 31.91261  |
| 10                    | 45.0636913           | 23.26659 | 30.44479                     | 0.764222 | 43.20494             | 22.88263 | 31.91261  |
| add Tx100             | 52.24188897          | 30.44479 |                              |          | 52.23492             | 31.91261 |           |

**17.14 W/cm2****REPLICATE 1****REPLICATE 2**

| Insonation time (min) | average fluorescence | F-F0 | Ftx100-F0 (F-F0)/(Ftx100-F0) |  | average fluorescence | F-F0 | Ftx100-F0 |
|-----------------------|----------------------|------|------------------------------|--|----------------------|------|-----------|
|-----------------------|----------------------|------|------------------------------|--|----------------------|------|-----------|

|           |             |          |          |          |          |          |          |
|-----------|-------------|----------|----------|----------|----------|----------|----------|
| 0         | 20.26983926 | 0        | 33.58847 | 0        | 20.2475  | 0        | 31.46824 |
| 1         | 28.23855473 | 7.968715 | 33.58847 | 0.237246 | 27.02821 | 6.780711 | 31.46824 |
| 2         | 33.44551572 | 13.17568 | 33.58847 | 0.392268 | 32.76249 | 12.51499 | 31.46824 |
| 3         | 37.96870318 | 17.69886 | 33.58847 | 0.526933 | 36.53575 | 16.28825 | 31.46824 |
| 5         | 43.84999429 | 23.58016 | 33.58847 | 0.702031 | 41.93819 | 21.6907  | 31.46824 |
| 10        | 47.9323796  | 27.66254 | 33.58847 | 0.823573 | 47.40959 | 27.16209 | 31.46824 |
| add Tx100 |             |          |          |          | 51.71574 | 31.46824 |          |

Non-PEG pH 7.4

## BATCH #1

### 6.08 W/cm2

| Insonation<br>time (min) | REPLICATE 1  |          |           |                    | REPLICATE 2  |          |           |
|--------------------------|--------------|----------|-----------|--------------------|--------------|----------|-----------|
|                          | average      | F-F0     | Ftx100-F0 | (F-F0)/(Ftx100-F0) | average      | F-F0     | Ftx100-F0 |
|                          | fluorescence |          |           |                    | fluorescence |          |           |
| 0                        | 50.01326752  | 0        | 63.81172  | 0                  | 46.24924     | 0        | 68.23344  |
| 1                        | 67.8281438   | 17.81488 | 63.81172  | 0.279179           | 63.13722     | 16.88798 | 68.23344  |
| 2                        | 76.2967324   | 26.28346 | 63.81172  | 0.411891           | 72.98356     | 26.73432 | 68.23344  |
| 3                        | 83.20345564  | 33.19019 | 63.81172  | 0.520127           | 80.07675     | 33.82751 | 68.23344  |
| 5                        | 100.1609863  | 50.14772 | 63.81172  | 0.78587            | 88.16382     | 41.91458 | 68.23344  |
| 10                       | 106.909752   | 56.89648 | 63.81172  | 0.891631           | 101.0002     | 54.75099 | 68.23344  |
| add Tx100                |              |          |           |                    | 114.4827     | 68.23344 |           |

### 6.97 W/cm2

| Insonation<br>time (min) | REPLICATE 1  |          |           |                    | REPLICATE 2  |          |           |
|--------------------------|--------------|----------|-----------|--------------------|--------------|----------|-----------|
|                          | average      | F-F0     | Ftx100-F0 | (F-F0)/(Ftx100-F0) | average      | F-F0     | Ftx100-F0 |
|                          | fluorescence |          |           |                    | fluorescence |          |           |
| 0                        | 45.95899508  | 0        | 68.46211  | 0                  | 47.48637     | 0        | 70.01486  |
| 1                        | 69.30910585  | 23.35011 | 68.46211  | 0.341066           | 72.13313     | 24.64676 | 70.01486  |
| 2                        | 82.86644762  | 36.90745 | 68.46211  | 0.539093           | 82.03982     | 34.55345 | 70.01486  |
| 3                        | 88.91280087  | 42.95381 | 68.46211  | 0.62741            | 92.19056     | 44.70419 | 70.01486  |
| 5                        | 98.328179    | 52.36918 | 68.46211  | 0.764937           | 105.2886     | 57.80222 | 70.01486  |
| 10                       | 105.0462217  | 59.08723 | 68.46211  | 0.863065           | 114.9766     | 67.4902  | 70.01486  |
| add Tx100                |              |          |           |                    | 117.5012     | 70.01486 |           |

### 11.83 W/cm2

| Insonation<br>time (min) | REPLICATE 1  |          |           |                    | REPLICATE 2  |          |           |
|--------------------------|--------------|----------|-----------|--------------------|--------------|----------|-----------|
|                          | average      | F-F0     | Ftx100-F0 | (F-F0)/(Ftx100-F0) | average      | F-F0     | Ftx100-F0 |
|                          | fluorescence |          |           |                    | fluorescence |          |           |
| 0                        | 45.90956927  | 0        | 68.82504  | 0                  | 45.50998     | 0        | 70.06111  |
| 1                        | 73.2448803   | 27.33531 | 68.82504  | 0.397171           | 73.92814     | 28.41816 | 70.06111  |
| 2                        | 86.42069822  | 40.51113 | 68.82504  | 0.58861            | 87.82404     | 42.31406 | 70.06111  |
| 3                        | 95.215014    | 49.30544 | 68.82504  | 0.716388           | 96.35974     | 50.84975 | 70.06111  |
| 5                        | 109.6707589  | 63.76119 | 68.82504  | 0.926424           | 103.9193     | 58.40934 | 70.06111  |
| 10                       | 112.018707   | 66.10914 | 68.82504  | 0.960539           | 117.9141     | 72.40414 | 70.06111  |
| add Tx100                |              |          |           |                    | 115.5711     | 70.06111 |           |

**17.14 W/cm2****REPLICATE 1****REPLICATE 2**

| Insonation time (min) | average fluorescence | F-F0     | Ftx100-F0 | (F-F0)/(Ftx100-F0) | average fluorescence | F-F0     | Ftx100-F0 |
|-----------------------|----------------------|----------|-----------|--------------------|----------------------|----------|-----------|
| 0                     | 47.02364257          | 0        | 76.68425  | 0                  | 45.14157             | 0        | 79.11699  |
| 1                     | 87.01207151          | 39.98843 | 76.68425  | 0.521469           | 83.39932             | 38.25775 | 79.11699  |
| 2                     | 105.8425871          | 58.81894 | 76.68425  | 0.767028           | 102.9832             | 57.84165 | 79.11699  |
| 3                     | 107.4538551          | 60.43021 | 76.68425  | 0.788039           | 104.6516             | 59.51006 | 79.11699  |
| 5                     | 120.3173015          | 73.29366 | 76.68425  | 0.955785           | 115.1131             | 69.97149 | 79.11699  |
| 10                    | 127.6473427          | 80.6237  | 76.68425  | 1.051372           | 136.5387             | 91.39711 | 79.11699  |
| add Tx100             | 123.7078945          | 76.68425 |           |                    | 124.2586             | 79.11699 |           |

PEG pH 5.2

**BATCH #1****BATCH #2****6.08 W/cm2****REPLICATE 1****6.08 W/cm2****REPLICATE 1**

| Insonation time (min) | average fluorescence | F-F0     | Ftx100-F0 | (F-F0)/(Ftx100-F0) | average fluorescence | F-F0     | Ftx100-F0 |
|-----------------------|----------------------|----------|-----------|--------------------|----------------------|----------|-----------|
| 0                     | 23.1743994           | 0        | 30.83787  | 0                  | 26.08264             | 0        | 20.02099  |
| 1                     | 25.18548789          | 2.011088 | 30.83787  | 0.065215           | 29.09646             | 3.013814 | 20.02099  |
| 2                     | 27.50329907          | 4.3289   | 30.83787  | 0.140376           | 30.13535             | 4.052712 | 20.02099  |
| 3                     | 29.79611547          | 6.621716 | 30.83787  | 0.214727           | 30.49535             | 4.412714 | 20.02099  |
| 5                     | 33.13081172          | 9.956412 | 30.83787  | 0.322863           | 33.55356             | 7.470917 | 20.02099  |
| 10                    | 41.28823612          | 18.11384 | 30.83787  | 0.587389           | 37.48308             | 11.40044 | 20.02099  |
| add Tx100             | 54.01227146          | 30.83787 |           |                    | 46.10363             | 20.02099 |           |

**6.97 W/cm2****REPLICATE 1****6.97 W/cm2****REPLICATE 1**

| Insonation time (min) | average fluorescence | F-F0     | Ftx100-F0 | (F-F0)/(Ftx100-F0) | average fluorescence | F-F0     | Ftx100-F0 |
|-----------------------|----------------------|----------|-----------|--------------------|----------------------|----------|-----------|
| 0                     | 21.83827864          | 0        | 38.52729  | 0                  | 26.88717             | 0        | 22.73594  |
| 1                     | 27.03018922          | 5.191911 | 38.52729  | 0.134759           | 28.30829             | 1.421122 | 22.73594  |
| 2                     | 30.28506108          | 8.446782 | 38.52729  | 0.219242           | 29.53767             | 2.650497 | 22.73594  |
| 3                     | 32.13799434          | 10.29972 | 38.52729  | 0.267336           | 32.6129              | 5.725733 | 22.73594  |
| 5                     | 39.07362441          | 17.23535 | 38.52729  | 0.447354           | 35.22246             | 8.335294 | 22.73594  |
| 10                    | 49.11081405          | 27.27254 | 38.52729  | 0.707876           | 42.9662              | 16.07903 | 22.73594  |
| add Tx100             | 60.36556794          | 38.52729 |           |                    | 49.62311             | 22.73594 |           |

**11.83 W/cm2****REPLICATE 1****11.83 W/cm2****REPLICATE 1**

| Insonation time (min) | average fluorescence | F-F0     | Ftx100-F0 | (F-F0)/(Ftx100-F0) | average fluorescence | F-F0     | Ftx100-F0 |
|-----------------------|----------------------|----------|-----------|--------------------|----------------------|----------|-----------|
| 0                     | 21.96826231          | 0        | 34.67209  | 0                  | 26.13711             | 0        | 23.51981  |
| 1                     | 28.69045043          | 6.722188 | 34.67209  | 0.193879           | 30.20104             | 4.063932 | 23.51981  |
| 2                     | 31.86965927          | 9.901397 | 34.67209  | 0.285573           | 33.21855             | 7.081438 | 23.51981  |

|           |             |          |          |          |          |          |          |
|-----------|-------------|----------|----------|----------|----------|----------|----------|
| 3         | 37.81583951 | 15.84758 | 34.67209 | 0.45707  | 35.94297 | 9.805856 | 23.51981 |
| 5         | 44.46625658 | 22.49799 | 34.67209 | 0.648879 | 39.13494 | 12.99783 | 23.51981 |
| 10        | 46.91564315 | 24.94738 | 34.67209 | 0.719524 | 44.12255 | 17.98544 | 23.51981 |
| add Tx100 | 56.6403483  | 34.67209 |          |          | 49.65692 | 23.51981 |          |

#### 17.14 W/cm2

##### REPLICATE 1

| Insonation time (min) | average fluorescence | F-F0     | Ftx100-F0 | (F-F0)/(Ftx100-F0) |
|-----------------------|----------------------|----------|-----------|--------------------|
| 0                     | 23.22302344          | 0        | 37.6722   | 0                  |
| 1                     | 30.61282287          | 7.389799 | 37.6722   | 0.196161           |
| 2                     | 32.68342607          | 9.460403 | 37.6722   | 0.251124           |
| 3                     | 38.80801435          | 15.58499 | 37.6722   | 0.4137             |
| 5                     | 43.91600725          | 20.69298 | 37.6722   | 0.549291           |
| 10                    | 54.67563315          | 31.45261 | 37.6722   | 0.834902           |
| add Tx100             | 60.89522008          | 37.6722  |           |                    |

#### 17.14 W/cm2

##### REPLICATE 1

| average fluorescence | F-F0     | Ftx100-F0 |
|----------------------|----------|-----------|
| 26.15216             | 0        | 26.63046  |
| 29.88188             | 3.729713 | 26.63046  |
| 33.7551              | 7.602938 | 26.63046  |
| 35.67173             | 9.519563 | 26.63046  |
| 40.42011             | 14.26795 | 26.63046  |
| 48.12311             | 21.97095 | 26.63046  |
| 52.78263             | 26.63046 |           |

PEG pH 7.4

### BATCH #1

#### 6.08 W/cm2

##### REPLICATE 1

| Insonation time (min) | average fluorescence | F-F0     | Ftx100-F0 | (F-F0)/(Ftx100-F0) |
|-----------------------|----------------------|----------|-----------|--------------------|
| 0                     | 48.46285954          | 0        | 80.1109   | 0                  |
| 1                     | 58.91334106          | 10.45048 | 80.1109   | 0.13045            |
| 2                     | 63.0088232           | 14.54596 | 80.1109   | 0.181573           |
| 3                     | 69.96311786          | 21.50026 | 80.1109   | 0.268381           |
| 5                     | 81.37554105          | 32.91268 | 80.1109   | 0.410839           |
| 10                    | 95.26124459          | 46.79839 | 80.1109   | 0.58417            |
| add Tx100             | 128.5737581          | 80.1109  |           |                    |

##### REPLICATE 2

| average fluorescence | F-F0     | Ftx100-F0 |
|----------------------|----------|-----------|
| 37.09199             | 0        | 77.87389  |
| 44.63935             | 7.547362 | 77.87389  |
| 49.29588             | 12.20389 | 77.87389  |
| 62.05769             | 24.9657  | 77.87389  |
| 65.4713              | 28.37931 | 77.87389  |
| 92.82467             | 55.73268 | 77.87389  |
| 114.9659             | 77.87389 |           |

#### 6.97 W/cm2

##### REPLICATE 1

| Insonation time (min) | average fluorescence | F-F0     | Ftx100-F0 | (F-F0)/(Ftx100-F0) |
|-----------------------|----------------------|----------|-----------|--------------------|
| 0                     | 45.35750645          | 0        | 73.50709  | 0                  |
| 1                     | 51.33242467          | 5.974918 | 73.50709  | 0.081284           |
| 2                     | 59.65294375          | 14.29544 | 73.50709  | 0.194477           |
| 3                     | 65.77756226          | 20.42006 | 73.50709  | 0.277797           |
| 5                     | 82.31045536          | 36.95295 | 73.50709  | 0.502713           |
| 10                    | 100.6332083          | 55.2757  | 73.50709  | 0.751978           |
| add Tx100             | 118.8646             | 73.50709 |           |                    |

##### REPLICATE 2

| average fluorescence | F-F0     | Ftx100-F0 |
|----------------------|----------|-----------|
| 37.19458             | 0        | 91.47731  |
| 48.46552             | 11.27093 | 91.47731  |
| 56.88161             | 19.68703 | 91.47731  |
| 61.85666             | 24.66208 | 91.47731  |
| 81.14076             | 43.94618 | 91.47731  |
| 93.36236             | 56.16778 | 91.47731  |
| 128.6719             | 91.47731 |           |

#### 11.83 W/cm2

##### REPLICATE 1

##### REPLICATE 2

| Insonation<br>time (min) | average<br>fluorescence | F-F0     | Ftx100-F0 (F-F0)/(Ftx100-F0) |          |  | average<br>fluorescence | F-F0     | Ftx100-F0 |
|--------------------------|-------------------------|----------|------------------------------|----------|--|-------------------------|----------|-----------|
| 0                        | 41.19866777             | 0        | 77.35538                     | 0        |  | 38.65042                | 0        | 78.4764   |
| 1                        | 48.96337484             | 7.764707 | 77.35538                     | 0.100377 |  | 50.65272                | 12.0023  | 78.4764   |
| 2                        | 61.83936999             | 20.6407  | 77.35538                     | 0.26683  |  | 64.25501                | 25.60459 | 78.4764   |
| 3                        | 71.5671458              | 30.36848 | 77.35538                     | 0.392584 |  | 74.42443                | 35.77401 | 78.4764   |
| 5                        | 83.69797018             | 42.4993  | 77.35538                     | 0.549403 |  | 87.356                  | 48.70558 | 78.4764   |
| 10                       | 96.69687126             | 55.4982  | 77.35538                     | 0.717445 |  | 98.82714                | 60.17672 | 78.4764   |
| add Tx100                | 118.5540468             | 77.35538 |                              |          |  | 117.1268                | 78.4764  |           |

**17.14 W/cm2**

**REPLICATE 1**

| Insonation<br>time (min) | average<br>fluorescence | F-F0     | Ftx100-F0 (F-F0)/(Ftx100-F0) |          |  | average<br>fluorescence | F-F0     | Ftx100-F0 |
|--------------------------|-------------------------|----------|------------------------------|----------|--|-------------------------|----------|-----------|
| 0                        | 37.8801482              | 0        | 87.27205                     | 0        |  | 41.31769                | 0        | 89.81494  |
| 1                        | 65.64928407             | 27.76914 | 87.27205                     | 0.318191 |  | 67.62677                | 26.30908 | 89.81494  |
| 2                        | 86.28846243             | 48.40831 | 87.27205                     | 0.554683 |  | 79.35777                | 38.04008 | 89.81494  |
| 3                        | 99.4201755              | 61.54003 | 87.27205                     | 0.705152 |  | 95.78877                | 54.47108 | 89.81494  |
| 5                        | 102.2887109             | 64.40856 | 87.27205                     | 0.738021 |  | 112.773                 | 71.45531 | 89.81494  |
| 10                       | 108.1581235             | 70.27798 | 87.27205                     | 0.805275 |  | 125.7104                | 84.39268 | 89.81494  |
| add Tx100                | 125.1521936             | 87.27205 |                              |          |  | 131.1326                | 89.81494 |           |

**REPLICATE 2**

**REPLICATE 3**

| $(F-F_0)/(F_{tx100}-F_0)$ | average      | F-F0     | Ftx100-F0 | $(F-F_0)/(F_{tx100}-F_0)$ |
|---------------------------|--------------|----------|-----------|---------------------------|
|                           | fluorescence |          |           |                           |
| 0                         | 17.75081     | 0        | 26.35007  | 0                         |
| 0.067159                  | 21.40121     | 3.650394 | 26.35007  | 0.138535                  |
| 0.21179                   | 22.66507     | 4.914258 | 26.35007  | 0.186499                  |
| 0.260793                  | 24.69432     | 6.943511 | 26.35007  | 0.26351                   |
| 0.469635                  | 30.42115     | 12.67034 | 26.35007  | 0.480847                  |
| 0.772145                  | 35.14088     | 17.39007 | 26.35007  | 0.659963                  |
|                           | 44.10088     | 26.35007 |           |                           |

**REPLICATE 3**

| $(F-F_0)/(F_{tx100}-F_0)$ | average      | F-F0     | Ftx100-F0 | $(F-F_0)/(F_{tx100}-F_0)$ |
|---------------------------|--------------|----------|-----------|---------------------------|
|                           | fluorescence |          |           |                           |
| 0                         | 18.48079     | 0        | 28.34388  | 0                         |
| 0.133863                  | 22.93186     | 4.451072 | 28.34388  | 0.157038                  |
| 0.231612                  | 28.30318     | 9.82239  | 28.34388  | 0.346544                  |
| 0.391289                  | 31.3529      | 12.87211 | 28.34388  | 0.454141                  |
| 0.695412                  | 40.82157     | 22.34077 | 28.34388  | 0.788204                  |
|                           | 46.82467     | 28.34388 |           |                           |

**REPLICATE 3**

| $(F-F_0)/(F_{tx100}-F_0)$ | average      | F-F0     | Ftx100-F0 | $(F-F_0)/(F_{tx100}-F_0)$ |
|---------------------------|--------------|----------|-----------|---------------------------|
|                           | fluorescence |          |           |                           |
| 0                         | 20.27643     | 0        | 32.46521  | 0                         |
| 0.116401                  | 24.37269     | 4.096262 | 32.46521  | 0.126174                  |
| 0.252458                  | 27.65797     | 7.381544 | 32.46521  | 0.227368                  |
| 0.382703                  | 32.87154     | 12.59512 | 32.46521  | 0.387957                  |
| 0.480109                  | 37.11679     | 16.84036 | 32.46521  | 0.51872                   |
| 0.71704                   | 44.75715     | 24.48073 | 32.46521  | 0.75406                   |
|                           | 52.74164     | 32.46521 |           |                           |

**REPLICATE 3**

| $(F-F_0)/(F_{tx100}-F_0)$ | average      | F-F0 | Ftx100-F0 | $(F-F_0)/(F_{tx100}-F_0)$ |
|---------------------------|--------------|------|-----------|---------------------------|
|                           | fluorescence |      |           |                           |

|          |          |          |          |          |
|----------|----------|----------|----------|----------|
| 0        | 18.8209  | 0        | 32.17508 | 0        |
| 0.215478 | 23.70921 | 4.88831  | 32.17508 | 0.151928 |
| 0.397702 | 30.53673 | 11.71583 | 32.17508 | 0.364128 |
| 0.517609 | 35.78611 | 16.96521 | 32.17508 | 0.527278 |
| 0.689288 | 37.81078 | 18.98988 | 32.17508 | 0.590205 |
| 0.863159 | 48.73133 | 29.91043 | 32.17508 | 0.929615 |
|          | 50.99597 | 32.17508 |          |          |

## BATCH #2

6.08 W/cm<sup>2</sup>

REPLICATE 1

| (F-F0)/(Ftx100-F0) | average<br>fluorescence | F-F0     | Ftx100-F0 | (F-F0)/(Ftx100-F0) | average<br>fluorescence | F-F0     | Ftx100-F0 |
|--------------------|-------------------------|----------|-----------|--------------------|-------------------------|----------|-----------|
| 0                  | 46.45755                | 0        | 64.24815  | 0                  | 45.75047                | 0        | 66.05962  |
| 0.247503           | 63.80558                | 17.34803 | 64.24815  | 0.270016           | 61.52737                | 15.77691 | 66.05962  |
| 0.391807           | 74.09645                | 27.6389  | 64.24815  | 0.43019            | 69.06011                | 23.30964 | 66.05962  |
| 0.495762           | 79.63875                | 33.18119 | 64.24815  | 0.516454           | 77.36079                | 31.61033 | 66.05962  |
| 0.614282           | 92.00809                | 45.55053 | 64.24815  | 0.708978           | 89.72876                | 43.97829 | 66.05962  |
| 0.802407           | 101.8724                | 55.41483 | 64.24815  | 0.862513           | 101.7624                | 56.01192 | 66.05962  |
|                    | 110.7057                | 64.24815 |           |                    | 111.8101                | 66.05962 |           |

6.97 W/cm<sup>2</sup>

REPLICATE 1

| (F-F0)/(Ftx100-F0) | average<br>fluorescence | F-F0     | Ftx100-F0 | (F-F0)/(Ftx100-F0) | average<br>fluorescence | F-F0     | Ftx100-F0 |
|--------------------|-------------------------|----------|-----------|--------------------|-------------------------|----------|-----------|
| 0                  | 46.09577                | 0        | 64.18411  | 0                  | 45.75658                | 0        | 62.82555  |
| 0.352022           | 66.35767                | 20.2619  | 64.18411  | 0.315684           | 63.77048                | 18.01389 | 62.82555  |
| 0.493516           | 79.70522                | 33.60945 | 64.18411  | 0.523641           | 75.98844                | 30.23186 | 62.82555  |
| 0.638496           | 90.91087                | 44.8151  | 64.18411  | 0.698227           | 84.66863                | 38.91204 | 62.82555  |
| 0.825571           | 97.69431                | 51.59854 | 64.18411  | 0.803915           | 95.56009                | 49.80351 | 62.82555  |
| 0.963941           | 110.1347                | 64.0389  | 64.18411  | 0.997738           | 108.6815                | 62.92492 | 62.82555  |
|                    | 110.2799                | 64.18411 |           |                    | 108.5821                | 62.82555 |           |

11.83 W/cm<sup>2</sup>

REPLICATE 1

| (F-F0)/(Ftx100-F0) | average<br>fluorescence | F-F0     | Ftx100-F0 | (F-F0)/(Ftx100-F0) | average<br>fluorescence | F-F0     | Ftx100-F0 |
|--------------------|-------------------------|----------|-----------|--------------------|-------------------------|----------|-----------|
| 0                  | 44.90491                | 0        | 71.74017  | 0                  | 44.36563                | 0        | 73.25798  |
| 0.40562            | 76.09085                | 31.18594 | 71.74017  | 0.434707           | 72.82424                | 28.45861 | 73.25798  |
| 0.603959           | 88.05063                | 43.14571 | 71.74017  | 0.601416           | 85.56082                | 41.19519 | 73.25798  |
| 0.725791           | 97.63287                | 52.72796 | 71.74017  | 0.734985           | 90.5046                 | 46.13897 | 73.25798  |
| 0.833691           | 106.4258                | 61.52086 | 71.74017  | 0.857551           | 103.8969                | 59.5313  | 73.25798  |
| 1.033443           | 114.4524                | 69.5475  | 71.74017  | 0.969436           | 115.0672                | 70.70161 | 73.25798  |
|                    | 116.6451                | 71.74017 |           |                    | 117.6236                | 73.25798 |           |

**17.14 W/cm<sup>2</sup>****REPLICATE 3****REPLICATE 1**

| (F-F0)/(Ftx100-F0) | average<br>fluorescence | F-F0     | Ftx100-F0 | (F-F0)/(Ftx100-F0) | average<br>fluorescence | F-F0     | Ftx100-F0 |
|--------------------|-------------------------|----------|-----------|--------------------|-------------------------|----------|-----------|
| 0                  | 42.03317                | 0        | 68.01803  | 0                  | 43.88918                | 0        | 75.28168  |
| 0.483559           | 85.74232                | 43.70915 | 68.01803  | 0.642611           | 80.06537                | 36.17619 | 75.28168  |
| 0.73109            | 96.15424                | 54.12107 | 68.01803  | 0.795687           | 101.7054                | 57.81622 | 75.28168  |
| 0.752178           | 105.1499                | 63.11671 | 68.01803  | 0.927941           | 110.6047                | 66.7155  | 75.28168  |
| 0.884405           | 109.0324                | 66.99927 | 68.01803  | 0.985022           | 120.4823                | 76.59313 | 75.28168  |
| 1.155215           | 114.1874                | 72.15427 | 68.01803  | 1.060811           | 120.2522                | 76.36307 | 75.28168  |
|                    | 110.0512                | 68.01803 |           |                    | 119.1709                | 75.28168 |           |

**BATCH #3****6.08 W/cm<sup>2</sup>****REPLICATE 2****REPLICATE 1**

| (F-F0)/(Ftx100-F0) | average<br>fluorescence | F-F0     | Ftx100-F0 | (F-F0)/(Ftx100-F0) | average<br>fluorescence | F-F0     | Ftx100-F0 |
|--------------------|-------------------------|----------|-----------|--------------------|-------------------------|----------|-----------|
| 0                  | 23.24603                | 0        | 25.19375  | 0                  | 42.38061                | 0        | 52.15314  |
| 0.150533           | 28.17671                | 4.930684 | 25.19375  | 0.195711           | 51.07583                | 8.695215 | 52.15314  |
| 0.202423           | 28.96873                | 5.722695 | 25.19375  | 0.227147           | 51.0239                 | 8.643286 | 52.15314  |
| 0.220404           | 31.64505                | 8.399025 | 25.19375  | 0.333377           | 58.18251                | 15.8019  | 52.15314  |
| 0.373154           | 35.15704                | 11.91101 | 25.19375  | 0.472776           | 65.71562                | 23.33501 | 52.15314  |
| 0.569424           | 39.9125                 | 16.66647 | 25.19375  | 0.661532           | 78.78097                | 36.40035 | 52.15314  |
|                    | 48.43978                | 25.19375 |           |                    | 94.53376                | 52.15314 |           |

**6.97 W/cm<sup>2</sup>****REPLICATE 1**

| (F-F0)/(Ftx100-F0) | average<br>fluorescence | F-F0     | Ftx100-F0 |
|--------------------|-------------------------|----------|-----------|
| 0                  | 33.60283                | 0        | 73.03158  |
| 0.062506           | 43.5918                 | 9.988971 | 73.03158  |
| 0.116577           | 51.53237                | 17.92954 | 73.03158  |
| 0.251836           | 58.23536                | 24.63253 | 73.03158  |
| 0.366613           | 68.33263                | 34.7298  | 73.03158  |
| 0.707207           | 83.74184                | 50.139   | 73.03158  |
|                    | 106.6344                | 73.03158 |           |

**11.83 W/cm<sup>2</sup>****REPLICATE 1**

| (F-F0)/(Ftx100-F0) | average<br>fluorescence | F-F0     | Ftx100-F0 |
|--------------------|-------------------------|----------|-----------|
| 0                  | 54.62739                | 0        | 41.39226  |
| 0.172788           | 59.56947                | 4.942079 | 41.39226  |
| 0.301084           | 66.4041                 | 11.77671 | 41.39226  |



|          |          |          |          |
|----------|----------|----------|----------|
| 0.416919 | 72.68759 | 18.0602  | 41.39226 |
| 0.552633 | 81.70863 | 27.08124 | 41.39226 |
| 0.764693 | 90.25744 | 35.63004 | 41.39226 |
|          | 96.01965 | 41.39226 |          |

**17.14 W/cm2**

**REPLICATE 1**

| <b>(F-F0)/(Ftx100-F0)</b> | <b>average F-F0 fluorescence</b> | <b>Ftx100-F0</b>  |
|---------------------------|----------------------------------|-------------------|
| 0                         | 38.42303                         | 0 65.79467        |
| 0.140054                  | 54.77377                         | 16.35074 65.79467 |
| 0.285498                  | 67.55627                         | 29.13323 65.79467 |
| 0.357469                  | 75.91286                         | 37.48982 65.79467 |
| 0.535775                  | 87.57243                         | 49.1494 65.79467  |
| 0.82503                   | 101.3417                         | 62.91865 65.79467 |
|                           | 104.2177                         | 65.79467          |

**BATCH #2**

**6.08 W/cm2**

**REPLICATE 1**

| <b>(F-F0)/(Ftx100-F0)</b> | <b>average F-F0 fluorescence</b> | <b>Ftx100-F0</b> | <b>(F-F0)/(Ftx100-F0)</b> | <b>average F-F0 fluorescence</b> | <b>Ftx100-F0</b>           |
|---------------------------|----------------------------------|------------------|---------------------------|----------------------------------|----------------------------|
| 0                         | 36.65844                         | 0                | 84.73838                  | 0                                | 69.53431 0 80.74623        |
| 0.096918                  | 45.00946                         | 8.351025         | 84.73838                  | 0.098551                         | 71.61732 2.083017 80.74623 |
| 0.156714                  | 55.95254                         | 19.2941          | 84.73838                  | 0.22769                          | 79.80489 10.27058 80.74623 |
| 0.320591                  | 58.43045                         | 21.77201         | 84.73838                  | 0.256932                         | 88.29154 18.75723 80.74623 |
| 0.364427                  | 72.24149                         | 35.58305         | 84.73838                  | 0.419917                         | 97.87019 28.33589 80.74623 |
| 0.715679                  | 97.44827                         | 60.78983         | 84.73838                  | 0.717382                         | 116.6986 47.16425 80.74623 |
|                           | 121.3968                         | 84.73838         |                           |                                  | 150.2805 80.74623          |

**6.97 W/cm2**

**REPLICATE 1**

| <b>(F-F0)/(Ftx100-F0)</b> | <b>average F-F0 fluorescence</b> | <b>Ftx100-F0</b> | <b>(F-F0)/(Ftx100-F0)</b> | <b>average F-F0 fluorescence</b> | <b>Ftx100-F0</b>           |
|---------------------------|----------------------------------|------------------|---------------------------|----------------------------------|----------------------------|
| 0                         | 36.64171                         | 0                | 84.48422                  | 0                                | 66.40748 0 81.27408        |
| 0.12321                   | 48.88664                         | 12.24492         | 84.48422                  | 0.144937                         | 75.05371 8.646233 81.27408 |
| 0.215212                  | 59.95202                         | 23.3103          | 84.48422                  | 0.275913                         | 83.17731 16.76983 81.27408 |
| 0.269598                  | 65.74734                         | 29.10563         | 84.48422                  | 0.34451                          | 91.60086 25.19339 81.27408 |
| 0.480405                  | 76.37956                         | 39.73785         | 84.48422                  | 0.470358                         | 106.2816 39.87411 81.27408 |
| 0.614008                  | 94.99391                         | 58.35219         | 84.48422                  | 0.690687                         | 127.2746 60.86715 81.27408 |
|                           | 121.1259                         | 84.48422         |                           |                                  | 147.6816 81.27408          |

**11.83 W/cm2**

**REPLICATE 1**

**REPLICATE 3**

| (F-F0)/(Ftx100-F0) | average F-F0<br>fluorescence | Ftx100-F0 | (F-F0)/(Ftx100-F0) | average F-F0<br>fluorescence | Ftx100-F0 |
|--------------------|------------------------------|-----------|--------------------|------------------------------|-----------|
| 0                  | 33.73611                     | 0         | 83.96943           | 62.49551                     | 0         |
| 0.152942           | 48.92411                     | 15.188    | 83.96943           | 78.38002                     | 15.88451  |
| 0.326271           | 61.75515                     | 28.01904  | 83.96943           | 90.48022                     | 27.98471  |
| 0.455857           | 70.01699                     | 36.28088  | 83.96943           | 100.2788                     | 37.78327  |
| 0.62064            | 81.93692                     | 48.20081  | 83.96943           | 116.8618                     | 54.36626  |
| 0.766813           | 101.0915                     | 67.35535  | 83.96943           | 138.1828                     | 75.68728  |
|                    | 117.7055                     | 83.96943  |                    | 159.05                       | 96.55444  |

17.14 W/cm2

REPLICATE 1

| (F-F0)/(Ftx100-F0) | average F-F0<br>fluorescence | Ftx100-F0 |
|--------------------|------------------------------|-----------|
| 0                  | 56.27126                     | 0         |
| 0.292925           | 82.36196                     | 26.0907   |
| 0.423538           | 99.87206                     | 43.6008   |
| 0.606481           | 110.5007                     | 54.22945  |
| 0.795584           | 125.8701                     | 69.59889  |
| 0.939629           | 140.0215                     | 83.75023  |
|                    | 146.7067                     | 90.43547  |



| (F-F0)/(Ftx100-F0) | REPLICATE 2             |          |           |          | (F-F0)/(Ftx100-F0) | REPLICATE 3             |          |           |
|--------------------|-------------------------|----------|-----------|----------|--------------------|-------------------------|----------|-----------|
|                    | average<br>fluorescence | F-F0     | Ftx100-F0 |          |                    | average<br>fluorescence | F-F0     | Ftx100-F0 |
| 0                  | 45.95295                | 0        | 65.45283  | 0        |                    | 44.39249                | 0        | 63.20978  |
| 0.238828           | 62.79389                | 16.84095 | 65.45283  | 0.257299 |                    | 58.89651                | 14.50402 | 63.20978  |
| 0.352858           | 70.4221                 | 24.46916 | 65.45283  | 0.373844 |                    | 68.00909                | 23.6166  | 63.20978  |
| 0.478512           | 78.29638                | 32.34344 | 65.45283  | 0.494149 |                    | 74.82566                | 30.43317 | 63.20978  |
| 0.665736           | 90.81408                | 44.86113 | 65.45283  | 0.685396 |                    | 85.82756                | 41.43507 | 63.20978  |
| 0.847899           | 107.5103                | 61.55733 | 65.45283  | 0.940484 |                    | 99.3017                 | 54.90921 | 63.20978  |
|                    | 111.4058                | 65.45283 |           |          |                    | 107.6023                | 63.20978 |           |

| (F-F0)/(Ftx100-F0) | REPLICATE 2             |          |           |          | (F-F0)/(Ftx100-F0) | REPLICATE 3             |          |           |
|--------------------|-------------------------|----------|-----------|----------|--------------------|-------------------------|----------|-----------|
|                    | average<br>fluorescence | F-F0     | Ftx100-F0 |          |                    | average<br>fluorescence | F-F0     | Ftx100-F0 |
| 0                  | 45.32181                | 0        | 67.83641  | 0        |                    | 44.12119                | 0        | 57.98404  |
| 0.286729           | 64.08567                | 18.76386 | 67.83641  | 0.276605 |                    | 68.78961                | 24.66842 | 57.98404  |
| 0.481203           | 79.22873                | 33.90692 | 67.83641  | 0.499834 |                    | 82.44852                | 38.32733 | 57.98404  |
| 0.619366           | 87.19191                | 41.87011 | 67.83641  | 0.617222 |                    | 87.70802                | 43.58683 | 57.98404  |
| 0.792727           | 103.4526                | 58.13074 | 67.83641  | 0.856925 |                    | 97.62157                | 53.50038 | 57.98404  |
| 1.001582           | 109.5504                | 64.22855 | 67.83641  | 0.946815 |                    | 107.5016                | 63.38037 | 57.98404  |
|                    | 113.1582                | 67.83641 |           |          |                    | 102.1052                | 57.98404 |           |

| (F-F0)/(Ftx100-F0) | REPLICATE 2             |          |           |          | (F-F0)/(Ftx100-F0) | REPLICATE 3             |          |           |
|--------------------|-------------------------|----------|-----------|----------|--------------------|-------------------------|----------|-----------|
|                    | average<br>fluorescence | F-F0     | Ftx100-F0 |          |                    | average<br>fluorescence | F-F0     | Ftx100-F0 |
| 0                  | 42.21117                | 0        | 72.55569  | 0        |                    | 42.81273                | 0        | 75.39427  |
| 0.388471           | 67.23666                | 25.02549 | 72.55569  | 0.344914 |                    | 67.93412                | 25.12139 | 75.39427  |
| 0.56233            | 79.60048                | 37.38931 | 72.55569  | 0.515319 |                    | 82.38984                | 39.57711 | 75.39427  |
| 0.629815           | 88.88992                | 46.67875 | 72.55569  | 0.643351 |                    | 90.80489                | 47.99216 | 75.39427  |
| 0.812626           | 100.944                 | 58.73287 | 72.55569  | 0.809487 |                    | 98.38456                | 55.57183 | 75.39427  |
| 0.965105           | 107.8412                | 65.63005 | 72.55569  | 0.904547 |                    | 107.7376                | 64.92486 | 75.39427  |
|                    | 114.7669                | 72.55569 |           |          |                    | 118.207                 | 75.39427 |           |

| (F-F0)/(Ftx100-F0) | REPLICATE 2  |          |           |                    | REPLICATE 3  |          |           |  |
|--------------------|--------------|----------|-----------|--------------------|--------------|----------|-----------|--|
|                    | average      | F-F0     | Ftx100-F0 | (F-F0)/(Ftx100-F0) | average      | F-F0     | Ftx100-F0 |  |
|                    | fluorescence |          |           |                    | fluorescence |          |           |  |
| 0                  | 41.8158      | 0        | 72.80219  | 0                  | 42.10029     | 0        | 72.98188  |  |
| 0.480544           | 77.54633     | 35.73053 | 72.80219  | 0.490789           | 80.35326     | 38.25297 | 72.98188  |  |
| 0.767999           | 92.44403     | 50.62823 | 72.80219  | 0.695422           | 95.3451      | 53.24481 | 72.98188  |  |
| 0.886212           | 102.2172     | 60.40143 | 72.80219  | 0.829665           | 104.1655     | 62.06524 | 72.98188  |  |
| 1.017421           | 108.7396     | 66.92378 | 72.80219  | 0.919255           | 112.1798     | 70.07953 | 72.98188  |  |
| 1.014365           | 113.9768     | 72.16098 | 72.80219  | 0.991192           | 121.614      | 79.51373 | 72.98188  |  |
|                    | 114.618      | 72.80219 |           |                    | 115.0822     | 72.98188 |           |  |

| (F-F0)/(Ftx100-F0) | REPLICATE 2  |          |           |                    | REPLICATE 3  |          |           |  |
|--------------------|--------------|----------|-----------|--------------------|--------------|----------|-----------|--|
|                    | average      | F-F0     | Ftx100-F0 | (F-F0)/(Ftx100-F0) | average      | F-F0     | Ftx100-F0 |  |
|                    | fluorescence |          |           |                    | fluorescence |          |           |  |
| 0                  | 33.60283     | 0        | 48.86157  | 0                  | 37.02339     | 0        | 48.43631  |  |
| 0.166725           | 43.5918      | 9.988971 | 48.86157  | 0.204434           | 44.6346      | 7.611209 | 48.43631  |  |
| 0.165729           | 51.53237     | 17.92954 | 48.86157  | 0.366946           | 47.75509     | 10.7317  | 48.43631  |  |
| 0.30299            | 58.23536     | 24.63253 | 48.86157  | 0.504129           | 57.30857     | 20.28519 | 48.43631  |  |
| 0.447432           | 68.33263     | 34.7298  | 48.86157  | 0.710779           | 61.86217     | 24.83879 | 48.43631  |  |
| 0.697951           | 81.07687     | 47.47404 | 48.86157  | 0.971603           | 75.81185     | 38.78846 | 48.43631  |  |
|                    | 82.4644      | 48.86157 |           |                    | 85.4597      | 48.43631 |           |  |

| (F-F0)/(Ftx100-F0) | REPLICATE 2  |          |           |                    | REPLICATE 3  |          |           |  |
|--------------------|--------------|----------|-----------|--------------------|--------------|----------|-----------|--|
|                    | average      | F-F0     | Ftx100-F0 | (F-F0)/(Ftx100-F0) | average      | F-F0     | Ftx100-F0 |  |
|                    | fluorescence |          |           |                    | fluorescence |          |           |  |
| 0                  | 39.67966     | 0        | 57.95353  | 0                  | 32.27542     | 0        | 65.18521  |  |
| 0.136776           | 48.8401      | 9.160443 | 57.95353  | 0.158065           | 47.59102     | 15.3156  | 65.18521  |  |
| 0.245504           | 57.39573     | 17.71607 | 57.95353  | 0.305694           | 55.07722     | 22.8018  | 65.18521  |  |
| 0.337286           | 64.46535     | 24.7857  | 57.95353  | 0.427682           | 59.01546     | 26.74005 | 65.18521  |  |
| 0.475545           | 71.07088     | 31.39122 | 57.95353  | 0.541662           | 70.46536     | 38.18994 | 65.18521  |  |
| 0.686539           | 84.84826     | 45.1686  | 57.95353  | 0.779393           | 92.06658     | 59.79116 | 65.18521  |  |
|                    | 97.63319     | 57.95353 |           |                    | 97.46063     | 65.18521 |           |  |

| (F-F0)/(Ftx100-F0) | REPLICATE 2  |          |           |                    | REPLICATE 3  |          |           |  |
|--------------------|--------------|----------|-----------|--------------------|--------------|----------|-----------|--|
|                    | average      | F-F0     | Ftx100-F0 | (F-F0)/(Ftx100-F0) | average      | F-F0     | Ftx100-F0 |  |
|                    | fluorescence |          |           |                    | fluorescence |          |           |  |
| 0                  | 37.56436     | 0        | 63.60756  | 0                  | 31.8486      | 0        | 68.82416  |  |
| 0.119396           | 53.2425      | 15.67814 | 63.60756  | 0.246482           | 48.95879     | 17.1102  | 68.82416  |  |
| 0.284515           | 57.86403     | 20.29967 | 63.60756  | 0.319139           | 59.98851     | 28.13992 | 68.82416  |  |

|          |          |          |          |          |          |          |          |
|----------|----------|----------|----------|----------|----------|----------|----------|
| 0.436318 | 67.35899 | 29.79463 | 63.60756 | 0.468413 | 67.05881 | 35.21022 | 68.82416 |
| 0.654258 | 78.50491 | 40.94055 | 63.60756 | 0.643643 | 77.8636  | 46.015   | 68.82416 |
| 0.86079  | 90.07541 | 52.51105 | 63.60756 | 0.825547 | 95.15226 | 63.30366 | 68.82416 |
|          | 101.1719 | 63.60756 |          |          | 100.6728 | 68.82416 |          |

| (F-F0)/(Ftx100-F0) | REPLICATE 2  |          |           |                    | REPLICATE 3  |          |           |
|--------------------|--------------|----------|-----------|--------------------|--------------|----------|-----------|
|                    | average      | F-F0     | Ftx100-F0 | (F-F0)/(Ftx100-F0) | average      | F-F0     | Ftx100-F0 |
|                    | fluorescence |          |           |                    | fluorescence |          |           |
| 0                  | 34.78363     | 0        | 78.02397  | 0                  | 38.14601     | 0        | 58.84085  |
| 0.248512           | 53.82689     | 19.04326 | 78.02397  | 0.244069           | 53.64904     | 15.50303 | 58.84085  |
| 0.44279            | 65.75053     | 30.9669  | 78.02397  | 0.39689            | 65.09151     | 26.9455  | 58.84085  |
| 0.5698             | 74.13403     | 39.35039 | 78.02397  | 0.504337           | 73.15539     | 35.00937 | 58.84085  |
| 0.747012           | 84.26741     | 49.48378 | 78.02397  | 0.634212           | 83.13054     | 44.98452 | 58.84085  |
| 0.956288           | 102.5112     | 67.72757 | 78.02397  | 0.868035           | 92.92099     | 54.77497 | 58.84085  |
|                    | 112.8076     | 78.02397 |           |                    | 96.98687     | 58.84085 |           |

| (F-F0)/(Ftx100-F0) | REPLICATE 2  |          |           |                    | REPLICATE 3  |          |           |  |
|--------------------|--------------|----------|-----------|--------------------|--------------|----------|-----------|--|
|                    | average      | F-F0     | Ftx100-F0 | (F-F0)/(Ftx100-F0) | average      | F-F0     | Ftx100-F0 |  |
|                    | fluorescence |          |           |                    | fluorescence |          |           |  |
| 0                  | 57.57679     | 0        | 94.19227  | 0                  | 55.59306     | 0        | 101.7015  |  |
| 0.025797           | 68.88809     | 11.3113  | 94.19227  | 0.120087           | 71.59164     | 15.99858 | 101.7015  |  |
| 0.127196           | 77.90657     | 20.32978 | 94.19227  | 0.215833           | 72.18131     | 16.58826 | 101.7015  |  |
| 0.232299           | 84.20004     | 26.62325 | 94.19227  | 0.282648           | 89.84798     | 34.25492 | 101.7015  |  |
| 0.350925           | 98.07024     | 40.49345 | 94.19227  | 0.429902           | 100.9481     | 45.35502 | 101.7015  |  |
| 0.584105           | 118.7378     | 61.16106 | 94.19227  | 0.649321           | 112.5213     | 56.92826 | 101.7015  |  |
|                    | 151.7691     | 94.19227 |           |                    | 157.2945     | 101.7015 |           |  |

| (F-F0)/(Ftx100-F0) | REPLICATE 2             |          |           |                    | REPLICATE 3             |          |           |
|--------------------|-------------------------|----------|-----------|--------------------|-------------------------|----------|-----------|
|                    | average<br>fluorescence | F-F0     | Ftx100-F0 | (F-F0)/(Ftx100-F0) | average<br>fluorescence | F-F0     | Ftx100-F0 |
| 0                  | 62.03064                | 0        | 94.17443  | 0                  | 63.57603                | 0        | 102.2555  |
| 0.106384           | 71.79887                | 9.768232 | 94.17443  | 0.103725           | 83.50674                | 19.9307  | 102.2555  |
| 0.206337           | 92.36622                | 30.33558 | 94.17443  | 0.322121           | 90.20163                | 26.62559 | 102.2555  |
| 0.309981           | 94.33224                | 32.30161 | 94.17443  | 0.342998           | 105.9547                | 42.3787  | 102.2555  |
| 0.490613           | 112.9843                | 50.9537  | 94.17443  | 0.541057           | 111.9472                | 48.3712  | 102.2555  |
| 0.748912           | 130.3626                | 68.33197 | 94.17443  | 0.725589           | 133.2256                | 69.64956 | 102.2555  |
|                    | 156.2051                | 94.17443 |           |                    | 165.8316                | 102.2555 |           |

REPLICATE 2

REPLICATE 3

| $(F-F_0)/(F_{tx100}-F_0)$ | average<br>fluorescence | F-F <sub>0</sub> | Ftx100-F <sub>0</sub> | $(F-F_0)/(F_{tx100}-F_0)$ | average<br>fluorescence | F-F <sub>0</sub> | Ftx100-F <sub>0</sub> |
|---------------------------|-------------------------|------------------|-----------------------|---------------------------|-------------------------|------------------|-----------------------|
| 0                         | 64.62679                | 0                | 94.70824              | 0                         | 49.25011                | 0                | 87.54072              |
| 0.164513                  | 75.75756                | 11.13078         | 94.70824              | 0.117527                  | 66.42829                | 17.17818         | 87.54072              |
| 0.289833                  | 93.00142                | 28.37464         | 94.70824              | 0.299601                  | 77.0442                 | 27.79409         | 87.54072              |
| 0.391316                  | 105.2028                | 40.576           | 94.70824              | 0.428432                  | 87.46709                | 38.21698         | 87.54072              |
| 0.563063                  | 125.1228                | 60.49601         | 94.70824              | 0.638762                  | 102.4812                | 53.23113         | 87.54072              |
| 0.783882                  | 137.2277                | 72.6009          | 94.70824              | 0.766574                  | 117.8717                | 68.62155         | 87.54072              |
|                           | 159.335                 | 94.70824         |                       |                           | 136.7908                | 87.54072         |                       |

| REPLICATE 2               |                         |                  |                       | REPLICATE 3               |                         |                  |                       |
|---------------------------|-------------------------|------------------|-----------------------|---------------------------|-------------------------|------------------|-----------------------|
| $(F-F_0)/(F_{tx100}-F_0)$ | average<br>fluorescence | F-F <sub>0</sub> | Ftx100-F <sub>0</sub> | $(F-F_0)/(F_{tx100}-F_0)$ | average<br>fluorescence | F-F <sub>0</sub> | Ftx100-F <sub>0</sub> |
| 0                         | 56.50463                | 0                | 106.1959              | 0                         | 61.19176                | 0                | 110.1523              |
| 0.288501                  | 87.86593                | 31.3613          | 106.1959              | 0.295316                  | 94.50538                | 33.31362         | 110.1523              |
| 0.482121                  | 113.4509                | 56.94625         | 106.1959              | 0.536238                  | 111.3887                | 50.19689         | 110.1523              |
| 0.599648                  | 118.62                  | 62.11539         | 106.1959              | 0.584913                  | 121.0335                | 59.84169         | 110.1523              |
| 0.769597                  | 146.3037                | 89.79908         | 106.1959              | 0.845599                  | 136.78                  | 75.58824         | 110.1523              |
| 0.926077                  | 151.0141                | 94.50943         | 106.1959              | 0.889954                  | 146.7815                | 85.58975         | 110.1523              |
|                           | 162.7005                | 106.1959         |                       |                           | 171.3441                | 110.1523         |                       |





### BATCH #3

6.08 W/cm<sup>2</sup>

REPLICATE 1

REPLICATE 2

| (F-F0)/(Ftx100-F0) | average<br>fluorescence | F-F0     | Ftx100-F0 | (F-F0)/(Ftx100-F0) | average<br>fluorescence | F-F0     | Ftx100-F0 |
|--------------------|-------------------------|----------|-----------|--------------------|-------------------------|----------|-----------|
| 0                  | 46.13682                | 0        | 63.5025   | 0                  | 45.43599                | 0        | 62.81266  |
| 0.229458           | 59.02942                | 12.8926  | 63.5025   | 0.203025           | 59.60469                | 14.1687  | 62.81266  |
| 0.373623           | 68.1041                 | 21.96728 | 63.5025   | 0.345928           | 68.52791                | 23.09193 | 62.81266  |
| 0.481463           | 74.57439                | 28.43757 | 63.5025   | 0.447818           | 77.04727                | 31.61129 | 62.81266  |
| 0.655517           | 83.67186                | 37.53504 | 63.5025   | 0.59108            | 85.21768                | 39.78169 | 62.81266  |
| 0.868682           | 96.52791                | 50.39109 | 63.5025   | 0.793529           | 93.73852                | 48.30254 | 62.81266  |
|                    | 109.6393                | 63.5025  |           |                    | 108.2486                | 62.81266 |           |

6.97 W/cm<sup>2</sup>

REPLICATE 1

REPLICATE 2

| (F-F0)/(Ftx100-F0) | average<br>fluorescence | F-F0     | Ftx100-F0 | (F-F0)/(Ftx100-F0) | average<br>fluorescence | F-F0     | Ftx100-F0 |
|--------------------|-------------------------|----------|-----------|--------------------|-------------------------|----------|-----------|
| 0                  | 49.07367                | 0        | 63.95728  | 0                  | 48.37923                | 0        | 69.5919   |
| 0.425435           | 70.2659                 | 21.19223 | 63.95728  | 0.33135            | 68.57364                | 20.19441 | 69.5919   |
| 0.660998           | 85.23587                | 36.16221 | 63.95728  | 0.565412           | 82.30004                | 33.92081 | 69.5919   |
| 0.751704           | 93.46059                | 44.38692 | 63.95728  | 0.694009           | 87.59842                | 39.21919 | 69.5919   |
| 0.922674           | 104.9557                | 55.88205 | 63.95728  | 0.87374            | 96.21537                | 47.83614 | 69.5919   |
| 1.093066           | 110.6795                | 61.60583 | 63.95728  | 0.963234           | 104.2801                | 55.90087 | 69.5919   |
|                    | 113.031                 | 63.95728 |           |                    | 117.9711                | 69.5919  |           |

11.83 W/cm<sup>2</sup>

REPLICATE 1

REPLICATE 2

| (F-F0)/(Ftx100-F0) | average<br>fluorescence | F-F0     | Ftx100-F0 | (F-F0)/(Ftx100-F0) | average<br>fluorescence | F-F0     | Ftx100-F0 |
|--------------------|-------------------------|----------|-----------|--------------------|-------------------------|----------|-----------|
| 0                  | 49.32524                | 0        | 71.25195  | 0                  | 41.96002                | 0        | 65.17297  |
| 0.3332             | 73.82263                | 24.49739 | 71.25195  | 0.343814           | 65.16311                | 23.20309 | 65.17297  |
| 0.524935           | 86.41592                | 37.09068 | 71.25195  | 0.520557           | 79.66305                | 37.70303 | 65.17297  |
| 0.636549           | 94.58642                | 45.26118 | 71.25195  | 0.635227           | 84.76718                | 42.80716 | 65.17297  |
| 0.737083           | 104.2829                | 54.95763 | 71.25195  | 0.771314           | 92.56087                | 50.60085 | 65.17297  |
| 0.861138           | 110.8793                | 61.55404 | 71.25195  | 0.863893           | 97.80776                | 55.84774 | 65.17297  |
|                    | 120.5772                | 71.25195 |           |                    | 107.133                 | 65.17297 |           |

17.14 W/cm2

REPLICATE 1

REPLICATE 2

| (F-F0)/(Ftx100-F0) | average      | F-F0     | Ftx100-F0 | (F-F0)/(Ftx100-F0) | average      | F-F0     | Ftx100-F0 |
|--------------------|--------------|----------|-----------|--------------------|--------------|----------|-----------|
|                    | fluorescence |          |           |                    | fluorescence |          |           |
| 0                  | 46.39899     | 0        | 69.43131  | 0                  | 45.97049     | 0        | 72.51887  |
| 0.524143           | 84.78896     | 38.38997 | 69.43131  | 0.55292            | 86.14425     | 40.17376 | 72.51887  |
| 0.729562           | 96.03562     | 49.63662 | 69.43131  | 0.714903           | 99.59047     | 53.61998 | 72.51887  |
| 0.85042            | 101.2235     | 54.82455 | 69.43131  | 0.789623           | 101.4106     | 55.44015 | 72.51887  |
| 0.960232           | 115.3196     | 68.92059 | 69.43131  | 0.992644           | 107.4815     | 61.51102 | 72.51887  |
| 1.089499           | 112.5583     | 66.15929 | 69.43131  | 0.952874           | 107.8176     | 61.84716 | 72.51887  |
|                    | 115.8303     | 69.43131 |           |                    | 118.4894     | 72.51887 |           |

(F-F0)/(Ftx100-F0)

|          |
|----------|
| 0        |
| 0.157139 |
| 0.221563 |
| 0.418801 |
| 0.512813 |
| 0.800814 |

(F-F0)/(Ftx100-F0)

|          |
|----------|
| 0        |
| 0.234955 |
| 0.3498   |
| 0.410216 |
| 0.585868 |
| 0.91725  |

(F-F0)/(Ftx100-F0)

|          |
|----------|
| 0        |
| 0.248607 |
| 0.408867 |

0.511597  
0.668588  
0.919788

**(F-F0)/(Ftx100-F0)**

0  
0.263474  
0.457939  
0.594984  
0.764512  
0.9309

### BATCH #3

**6.08 W/cm2**

**REPLICATE 1**

**REPLICATE 2**

| <b>(F-F0)/(Ftx100-F0)</b> | <b>average</b>      | <b>F-F0</b> | <b>Ftx100-F0</b> | <b>(F-F0)/(Ftx100-F0)</b> | <b>average</b>      | <b>F-F0</b> | <b>Ftx100-F0</b> |
|---------------------------|---------------------|-------------|------------------|---------------------------|---------------------|-------------|------------------|
|                           | <b>fluorescence</b> |             |                  |                           | <b>fluorescence</b> |             |                  |
| <u>0</u>                  | 64.57567            | 0           | 94.95024         | 0                         | 62.42075            | 0           | 89.09205         |
| 0.157309                  | 77.43944            | 12.86377    | 94.95024         | 0.135479                  | 77.4586             | 15.03785    | 89.09205         |
| 0.163107                  | 89.53179            | 24.95612    | 94.95024         | 0.262834                  | 89.84797            | 27.42722    | 89.09205         |
| 0.336818                  | 104.06              | 39.48435    | 94.95024         | 0.415843                  | 97.00798            | 34.58724    | 89.09205         |
| 0.445962                  | 124.151             | 59.57535    | 94.95024         | 0.627438                  | 115.0914            | 52.67061    | 89.09205         |
| 0.559759                  | 132.4723            | 67.89667    | 94.95024         | 0.715076                  | 128.6282            | 66.20748    | 89.09205         |
|                           | 159.5259            | 94.95024    |                  |                           | 151.5128            | 89.09205    |                  |

**6.97 W/cm2**

**REPLICATE 1**

**REPLICATE 2**

| <b>(F-F0)/(Ftx100-F0)</b> | <b>average</b>      | <b>F-F0</b> | <b>Ftx100-F0</b> | <b>(F-F0)/(Ftx100-F0)</b> | <b>average</b>      | <b>F-F0</b> | <b>Ftx100-F0</b> |
|---------------------------|---------------------|-------------|------------------|---------------------------|---------------------|-------------|------------------|
|                           | <b>fluorescence</b> |             |                  |                           | <b>fluorescence</b> |             |                  |
| <u>0</u>                  | 58.87901            | 0           | 94.93416         | 0                         | 65.49693            | 0           | 88.17501         |
| 0.194911                  | 87.89126            | 29.01225    | 94.93416         | 0.305604                  | 80.43241            | 14.93548    | 88.17501         |
| 0.260383                  | 97.34345            | 38.46443    | 94.93416         | 0.40517                   | 97.85477            | 32.35784    | 88.17501         |
| 0.414439                  | 115.256             | 56.37695    | 94.93416         | 0.593853                  | 113.527             | 48.03007    | 88.17501         |
| 0.473042                  | 125.4621            | 66.58307    | 94.93416         | 0.701361                  | 129.3989            | 63.902      | 88.17501         |
| 0.681132                  | 142.3433            | 83.46431    | 94.93416         | 0.879181                  | 138.2052            | 72.7083     | 88.17501         |
|                           | 153.8132            | 94.93416    |                  |                           | 153.6719            | 88.17501    |                  |

**11.83 W/cm2**

**REPLICATE 1**

**REPLICATE 2**

| $(F-F_0)/(F_{tx100}-F_0)$ | average<br>fluorescence | F-F <sub>0</sub> | F <sub>tx100</sub> -F <sub>0</sub> | $(F-F_0)/(F_{tx100}-F_0)$ | average<br>fluorescence | F-F <sub>0</sub> | F <sub>tx100</sub> -F <sub>0</sub> |
|---------------------------|-------------------------|------------------|------------------------------------|---------------------------|-------------------------|------------------|------------------------------------|
| 0                         | 61.78748                | 0                | 124.4554                           | 0                         | 60.94861                | 0                | 105.5811                           |
| 0.196231                  | 94.45367                | 32.66619         | 124.4554                           | 0.262473                  | 91.24255                | 30.29394         | 105.5811                           |
| 0.317499                  | 117.1795                | 55.39202         | 124.4554                           | 0.445075                  | 110.4534                | 49.50477         | 105.5811                           |
| 0.436562                  | 123.2698                | 61.48234         | 124.4554                           | 0.494011                  | 129.9824                | 69.0338          | 105.5811                           |
| 0.608073                  | 134.7166                | 72.92915         | 124.4554                           | 0.585986                  | 140.9917                | 80.04312         | 105.5811                           |
| 0.783881                  | 152.3838                | 90.59632         | 124.4554                           | 0.727942                  | 150.858                 | 89.90942         | 105.5811                           |
|                           | 186.2429                | 124.4554         |                                    |                           | 166.5297                | 105.5811         |                                    |

**17.14 W/cm<sup>2</sup>**

**REPLICATE 1**

**REPLICATE 2**

| $(F-F_0)/(F_{tx100}-F_0)$ | average<br>fluorescence | F-F <sub>0</sub> | F <sub>tx100</sub> -F <sub>0</sub> | $(F-F_0)/(F_{tx100}-F_0)$ | average<br>fluorescence | F-F <sub>0</sub> | F <sub>tx100</sub> -F <sub>0</sub> |
|---------------------------|-------------------------|------------------|------------------------------------|---------------------------|-------------------------|------------------|------------------------------------|
| 0                         | 67.51175                | 0                | 94.38288                           | 0                         | 66.75018                | 0                | 101.7994                           |
| 0.302432                  | 108.0858                | 40.57403         | 94.38288                           | 0.429888                  | 114.1225                | 47.37231         | 101.7994                           |
| 0.455704                  | 132.4214                | 64.90961         | 94.38288                           | 0.687727                  | 123.8811                | 57.13091         | 101.7994                           |
| 0.543263                  | 150.4326                | 82.92089         | 94.38288                           | 0.878559                  | 150.3532                | 83.60299         | 101.7994                           |
| 0.686216                  | 155.3115                | 87.79974         | 94.38288                           | 0.930251                  | 155.9262                | 89.17605         | 101.7994                           |
| 0.777013                  | 161.5345                | 94.02273         | 94.38288                           | 0.996184                  | 169.0051                | 102.2549         | 101.7994                           |
|                           | 161.8946                | 94.38288         |                                    |                           | 168.5496                | 101.7994         |                                    |



**REPLICATE 3**

| $(F-F_0)/(F_{tx100}-F_0)$ | average      | F-F <sub>0</sub> | F <sub>tx100</sub> -F <sub>0</sub> | $(F-F_0)/(F_{tx100}-F_0)$ |
|---------------------------|--------------|------------------|------------------------------------|---------------------------|
|                           | fluorescence |                  |                                    |                           |
| 0                         | 50.26989     | 0                | 57.73011                           | 0                         |
| 0.225571                  | 64.55754     | 14.28765         | 57.73011                           | 0.24749                   |
| 0.367632                  | 71.55343     | 21.28354         | 57.73011                           | 0.368673                  |
| 0.503263                  | 79.07978     | 28.80988         | 57.73011                           | 0.499044                  |
| 0.633339                  | 94.81733     | 44.54743         | 57.73011                           | 0.77165                   |
| 0.768994                  | 108.1997     | 57.92979         | 57.73011                           | 1.003459                  |
|                           | 108          | 57.73011         |                                    |                           |

**REPLICATE 3**

| $(F-F_0)/(F_{tx100}-F_0)$ | average      | F-F <sub>0</sub> | F <sub>tx100</sub> -F <sub>0</sub> | $(F-F_0)/(F_{tx100}-F_0)$ |
|---------------------------|--------------|------------------|------------------------------------|---------------------------|
|                           | fluorescence |                  |                                    |                           |
| 0                         | 45.10072     | 0                | 64.07916                           | 0                         |
| 0.290183                  | 65.28287     | 20.18215         | 64.07916                           | 0.314957                  |
| 0.487425                  | 76.6085      | 31.50778         | 64.07916                           | 0.491701                  |
| 0.56356                   | 83.95782     | 38.8571          | 64.07916                           | 0.606392                  |
| 0.687381                  | 94.16985     | 49.06913         | 64.07916                           | 0.765758                  |
| 0.803267                  | 101.1089     | 56.00814         | 64.07916                           | 0.874046                  |
|                           | 109.1799     | 64.07916         |                                    |                           |

**REPLICATE 3**

| $(F-F_0)/(F_{tx100}-F_0)$ | average      | F-F <sub>0</sub> | F <sub>tx100</sub> -F <sub>0</sub> | $(F-F_0)/(F_{tx100}-F_0)$ |
|---------------------------|--------------|------------------|------------------------------------|---------------------------|
|                           | fluorescence |                  |                                    |                           |
| 0                         | 43.29374     | 0                | 71.62425                           | 0                         |
| 0.356023                  | 72.04948     | 28.75574         | 71.62425                           | 0.40148                   |
| 0.578507                  | 87.67187     | 44.37812         | 71.62425                           | 0.619596                  |
| 0.656824                  | 92.17897     | 48.88522         | 71.62425                           | 0.682523                  |
| 0.776409                  | 99.35119     | 56.05745         | 71.62425                           | 0.78266                   |
| 0.856916                  | 112.9586     | 69.66486         | 71.62425                           | 0.972643                  |
|                           | 114.918      | 71.62425         |                                    |                           |

**REPLICATE 3**

| <b>(F-F0)/(Ftx100-F0)</b> | <b>average</b>      | <b>F-F0</b> | <b>Ftx100-F0</b> | <b>(F-F0)/(Ftx100-F0)</b> |
|---------------------------|---------------------|-------------|------------------|---------------------------|
|                           | <b>fluorescence</b> |             |                  |                           |
| 0                         | 46.23314            | 0           | 67.39539         | 0                         |
| 0.553977                  | 83.75281            | 37.51968    | 67.39539         | 0.55671                   |
| 0.739394                  | 96.85227            | 50.61913    | 67.39539         | 0.751077                  |
| 0.764493                  | 101.7744            | 55.54123    | 67.39539         | 0.82411                   |
| 0.848207                  | 109.7236            | 63.49043    | 67.39539         | 0.942059                  |
| 0.852842                  | 111.613             | 65.37987    | 67.39539         | 0.970094                  |
|                           | 113.6285            | 67.39539    |                  |                           |

## BATCH #4

6.08 W/cm<sup>2</sup>

### REPLICATE 1

| (F-F0)/(Ftx100-F0) | average<br>fluorescence | F-F0     | Ftx100-F0 | (F-F0)/(Ftx100-F0) |
|--------------------|-------------------------|----------|-----------|--------------------|
| 0                  | 23.32293                | 0        | 38.60042  |                    |
| 0.16879            | 30.30164                | 6.978709 | 38.60042  |                    |
| 0.307853           | 34.80127                | 11.47834 | 38.60042  |                    |
| 0.388219           | 42.08755                | 18.76462 | 38.60042  |                    |
| 0.591193           | 46.75918                | 23.43626 | 38.60042  |                    |
| 0.743136           | 53.14329                | 29.82036 | 38.60042  |                    |
|                    | 61.92335                | 38.60042 |           |                    |

6.97 W/cm<sup>2</sup>

### REPLICATE 1

| (F-F0)/(Ftx100-F0) | average<br>fluorescence | F-F0     | Ftx100-F0 | (F-F0)/(Ftx100-F0) |
|--------------------|-------------------------|----------|-----------|--------------------|
| 0                  | 24.50675                | 0        | 37.79835  |                    |
| 0.169384           | 35.295                  | 10.78825 | 37.79835  |                    |
| 0.366973           | 41.86624                | 17.35949 | 37.79835  |                    |
| 0.544713           | 48.69166                | 24.18491 | 37.79835  |                    |
| 0.724718           | 53.43571                | 28.92895 | 37.79835  |                    |
| 0.824591           | 62.67004                | 38.16329 | 37.79835  |                    |
|                    | 62.3051                 | 37.79835 |           |                    |

11.83 W/cm<sup>2</sup>

### REPLICATE 1

### REPLICATE 3

| (F-F0)/(Ftx100-F0) | average<br>fluorescence | F-F0     | Ftx100-F0 | (F-F0)/(Ftx100-F0) |
|--------------------|-------------------------|----------|-----------|--------------------|
| 0                  | 66.43686                | 0        | 98.79221  | 0                  |
| 0.16879            | 75.54925                | 9.11239  | 98.79221  | 0.092238           |
| 0.307853           | 93.80697                | 27.37011 | 98.79221  | 0.277047           |
| 0.388219           | 102.7689                | 36.33202 | 98.79221  | 0.367762           |
| 0.591193           | 121.008                 | 54.57117 | 98.79221  | 0.552383           |
| 0.743136           | 140.4836                | 74.04675 | 98.79221  | 0.74952            |
|                    | 165.2291                | 98.79221 |           |                    |

### REPLICATE 3

| (F-F0)/(Ftx100-F0) | average<br>fluorescence | F-F0     | Ftx100-F0 | (F-F0)/(Ftx100-F0) |
|--------------------|-------------------------|----------|-----------|--------------------|
| 0                  | 67.41403                | 0        | 100.1605  | 0                  |
| 0.169384           | 88.04349                | 20.62946 | 100.1605  | 0.205964           |
| 0.366973           | 103.3687                | 35.95467 | 100.1605  | 0.358971           |
| 0.544713           | 120.1046                | 52.69059 | 100.1605  | 0.526062           |
| 0.724718           | 141.3517                | 73.93765 | 100.1605  | 0.738192           |
| 0.824591           | 158.9535                | 91.53946 | 100.1605  | 0.913928           |
|                    | 167.5745                | 100.1605 |           |                    |

### REPLICATE 3



| $(F-F_0)/(F_{tx100}-F_0)$ | average<br>fluorescence | F-F0     | Ftx100-F0 | $(F-F_0)/(F_{tx100}-F_0)$ |
|---------------------------|-------------------------|----------|-----------|---------------------------|
| 0                         | 63.73744                | 0        | 108.3114  | 0                         |
| 0.286926                  | 104.7977                | 41.06028 | 108.3114  | 0.379095                  |
| 0.468879                  | 119.6759                | 55.93848 | 108.3114  | 0.51646                   |
| 0.653846                  | 121.7977                | 58.06022 | 108.3114  | 0.536049                  |
| 0.75812                   | 152.2039                | 88.46649 | 108.3114  | 0.816779                  |
| 0.851567                  | 159.4206                | 95.68313 | 108.3114  | 0.883408                  |
|                           | 172.0488                | 108.3114 |           |                           |

| $(F-F_0)/(F_{tx100}-F_0)$ | average<br>fluorescence | F-F0     | Ftx100-F0 |
|---------------------------|-------------------------|----------|-----------|
|                           | 23.74796                | 0        | 39.66309  |
|                           | 37.63769                | 13.88973 | 39.66309  |
|                           | 44.88275                | 21.1348  | 39.66309  |
|                           | 49.16336                | 25.41541 | 39.66309  |
|                           | 56.56397                | 32.81602 | 39.66309  |
|                           | 60.31713                | 36.56917 | 39.66309  |
|                           | 63.41105                | 39.66309 |           |

| REPLICATE 3               |                         |          |           |                           |
|---------------------------|-------------------------|----------|-----------|---------------------------|
| $(F-F_0)/(F_{tx100}-F_0)$ | average<br>fluorescence | F-F0     | Ftx100-F0 | $(F-F_0)/(F_{tx100}-F_0)$ |
| 0                         | 64.53335                | 0        | 99.70538  | 0                         |
| 0.465349                  | 111.7221                | 47.18876 | 99.70538  | 0.473282                  |
| 0.56121                   | 130.5317                | 65.99835 | 99.70538  | 0.661934                  |
| 0.821252                  | 139.258                 | 74.72467 | 99.70538  | 0.749455                  |
| 0.875998                  | 156.5                   | 91.96664 | 99.70538  | 0.922384                  |
| 1.004474                  | 158.458                 | 93.92463 | 99.70538  | 0.942022                  |
|                           | 164.2387                | 99.70538 |           |                           |

| 17.14 W/cm2               |                         |          |           |
|---------------------------|-------------------------|----------|-----------|
| REPLICATE 1               |                         |          |           |
| $(F-F_0)/(F_{tx100}-F_0)$ | average<br>fluorescence | F-F0     | Ftx100-F0 |
|                           | 24.34448                | 0        | 42.5311   |
|                           | 46.82472                | 22.48023 | 42.5311   |
|                           | 55.74334                | 31.39885 | 42.5311   |
|                           | 61.39919                | 37.05471 | 42.5311   |
|                           | 64.16988                | 39.8254  | 42.5311   |
|                           | 70.00383                | 45.65934 | 42.5311   |
|                           | 66.87558                | 42.5311  |           |







| (F-F0)/(Ftx100-F0) | REPLICATE 2             |          |           |                    | REPLICATE 3             |          |           |  |
|--------------------|-------------------------|----------|-----------|--------------------|-------------------------|----------|-----------|--|
|                    | average<br>fluorescence | F-F0     | Ftx100-F0 | (F-F0)/(Ftx100-F0) | average<br>fluorescence | F-F0     | Ftx100-F0 |  |
| 0                  | 23.94366                | 0        | 38.35497  | 0                  | 23.88134                | 0        | 40.21591  |  |
| 0.180794           | 33.87301                | 9.929354 | 38.35497  | 0.258881           | 34.05014                | 10.1688  | 40.21591  |  |
| 0.297363           | 38.55741                | 14.61376 | 38.35497  | 0.381013           | 39.4015                 | 15.52016 | 40.21591  |  |
| 0.486125           | 45.51486                | 21.5712  | 38.35497  | 0.562409           | 43.67959                | 19.79825 | 40.21591  |  |
| 0.60715            | 51.71074                | 27.76708 | 38.35497  | 0.72395            | 47.6317                 | 23.75036 | 40.21591  |  |
| 0.77254            | 54.57454                | 30.63088 | 38.35497  | 0.798616           | 54.56724                | 30.6859  | 40.21591  |  |
|                    | 62.29863                | 38.35497 |           |                    | 64.09725                | 40.21591 |           |  |

| (F-F0)/(Ftx100-F0) | REPLICATE 2             |          |           |                    | REPLICATE 3             |          |           |  |
|--------------------|-------------------------|----------|-----------|--------------------|-------------------------|----------|-----------|--|
|                    | average<br>fluorescence | F-F0     | Ftx100-F0 | (F-F0)/(Ftx100-F0) | average<br>fluorescence | F-F0     | Ftx100-F0 |  |
| 0                  | 23.89949                | 0        | 42.03514  | 0                  | 24.3371                 | 0        | 43.24983  |  |
| 0.285416           | 34.63012                | 10.73063 | 42.03514  | 0.255278           | 38.61772                | 14.28062 | 43.24983  |  |
| 0.459266           | 40.65663                | 16.75714 | 42.03514  | 0.398646           | 42.90691                | 18.56981 | 43.24983  |  |
| 0.639841           | 46.28463                | 22.38514 | 42.03514  | 0.532534           | 48.24881                | 23.9117  | 43.24983  |  |
| 0.76535            | 53.12778                | 29.22829 | 42.03514  | 0.69533            | 55.45418                | 31.11708 | 43.24983  |  |
| 1.009655           | 57.81498                | 33.91549 | 42.03514  | 0.806837           | 64.18758                | 39.85048 | 43.24983  |  |
|                    | 65.93463                | 42.03514 |           |                    | 67.58693                | 43.24983 |           |  |

REPLICATE 2

REPLICATE 3

| $(F-F_0)/(F_{tx100}-F_0)$ | average<br>fluorescence | F-F <sub>0</sub> | F <sub>tx100</sub> -F <sub>0</sub> | $(F-F_0)/(F_{tx100}-F_0)$ | average<br>fluorescence | F-F <sub>0</sub> | F <sub>tx100</sub> -F <sub>0</sub> |
|---------------------------|-------------------------|------------------|------------------------------------|---------------------------|-------------------------|------------------|------------------------------------|
| 0                         | 26.0358                 | 0                | 45.35682                           | 0                         | 24.4933                 | 0                | 44.25536                           |
| 0.350193                  | 38.92735                | 12.89155         | 45.35682                           | 0.284225                  | 39.25887                | 14.76557         | 44.25536                           |
| 0.532858                  | 47.72787                | 21.69207         | 45.35682                           | 0.478254                  | 49.25572                | 24.76242         | 44.25536                           |
| 0.640782                  | 51.87967                | 25.84388         | 45.35682                           | 0.56979                   | 51.7116                 | 27.2183          | 44.25536                           |
| 0.827369                  | 60.19099                | 34.15519         | 45.35682                           | 0.753033                  | 61.91593                | 37.42263         | 44.25536                           |
| 0.921995                  | 65.39883                | 39.36303         | 45.35682                           | 0.867853                  | 63.29677                | 38.80347         | 44.25536                           |
|                           | 71.39262                | 45.35682         |                                    |                           | 68.74866                | 44.25536         |                                    |

| REPLICATE 2               |                         |                  |                                    | REPLICATE 3               |                         |                  |                                    |
|---------------------------|-------------------------|------------------|------------------------------------|---------------------------|-------------------------|------------------|------------------------------------|
| $(F-F_0)/(F_{tx100}-F_0)$ | average<br>fluorescence | F-F <sub>0</sub> | F <sub>tx100</sub> -F <sub>0</sub> | $(F-F_0)/(F_{tx100}-F_0)$ | average<br>fluorescence | F-F <sub>0</sub> | F <sub>tx100</sub> -F <sub>0</sub> |
| 0                         | 23.1713                 | 0                | 41.43433                           | 0                         | 24.06414                | 0                | 37.37745                           |
| 0.52856                   | 44.50966                | 21.33837         | 41.43433                           | 0.514992                  | 45.90835                | 21.84421         | 37.37745                           |
| 0.738256                  | 51.78295                | 28.61166         | 41.43433                           | 0.69053                   | 54.22788                | 30.16374         | 37.37745                           |
| 0.871238                  | 56.10839                | 32.93709         | 41.43433                           | 0.794923                  | 61.05463                | 36.99048         | 37.37745                           |
| 0.936383                  | 61.14191                | 37.97061         | 41.43433                           | 0.916405                  | 61.94589                | 37.88175         | 37.37745                           |
| 1.073552                  | 62.15242                | 38.98113         | 41.43433                           | 0.940793                  | 65.21169                | 41.14755         | 37.37745                           |
|                           | 64.60563                | 41.43433         |                                    |                           | 61.44159                | 37.37745         |                                    |









## BATCH #5

6.08 W/cm<sup>2</sup>

REPLICATE 1

REPLICATE 2

| (F-F0)/(Ftx100-F0) | average<br>fluorescence | F-F0     | Ftx100-F0 | (F-F0)/(Ftx100-F0) | average<br>fluorescence | F-F0     | Ftx100-F0 |
|--------------------|-------------------------|----------|-----------|--------------------|-------------------------|----------|-----------|
| 0                  | 48.08855                | 0        | 80.20485  | 0                  | 46.99254                | 0        | 76.11055  |
| 0.252855           | 61.50018                | 13.41162 | 80.20485  | 0.167217           | 58.97946                | 11.98692 | 76.11055  |
| 0.385921           | 71.00762                | 22.91907 | 80.20485  | 0.285757           | 67.16995                | 20.17742 | 76.11055  |
| 0.492299           | 75.25165                | 27.1631  | 80.20485  | 0.338671           | 74.78795                | 27.79542 | 76.11055  |
| 0.590571           | 89.22201                | 41.13346 | 80.20485  | 0.512855           | 85.20692                | 38.21439 | 76.11055  |
| 0.763029           | 105.2943                | 57.20577 | 80.20485  | 0.713246           | 97.06694                | 50.0744  | 76.11055  |
|                    | 128.2934                | 80.20485 |           |                    | 123.1031                | 76.11055 |           |

6.97 W/cm<sup>2</sup>

REPLICATE 1

REPLICATE 2

| (F-F0)/(Ftx100-F0) | average<br>fluorescence | F-F0     | Ftx100-F0 | (F-F0)/(Ftx100-F0) | average<br>fluorescence | F-F0     | Ftx100-F0 |
|--------------------|-------------------------|----------|-----------|--------------------|-------------------------|----------|-----------|
| 0                  | 45.69321                | 0        | 79.23852  | 0                  | 43.60234                | 0        | 72.06119  |
| 0.330189           | 64.58902                | 18.89581 | 79.23852  | 0.238467           | 60.61048                | 17.00813 | 72.06119  |
| 0.429361           | 74.42607                | 28.73286 | 79.23852  | 0.362612           | 72.12397                | 28.52162 | 72.06119  |
| 0.552874           | 88.11871                | 42.4255  | 79.23852  | 0.535415           | 79.60876                | 36.00642 | 72.06119  |
| 0.719473           | 95.00645                | 49.31323 | 79.23852  | 0.622339           | 94.79545                | 51.1931  | 72.06119  |
| 0.921402           | 114.7461                | 69.05291 | 79.23852  | 0.871456           | 106.2353                | 62.63294 | 72.06119  |
|                    | 124.9317                | 79.23852 |           |                    | 115.6635                | 72.06119 |           |

11.83 W/cm<sup>2</sup>

REPLICATE 1

REPLICATE 2

| $(F-F_0)/(F_{tx100}-F_0)$ | average<br>fluorescence | F-F0     | Ftx100-F0 | $(F-F_0)/(F_{tx100}-F_0)$ | average<br>fluorescence | F-F0     | Ftx100-F0 |
|---------------------------|-------------------------|----------|-----------|---------------------------|-------------------------|----------|-----------|
| 0                         | 43.4772                 | 0        | 72.35804  | 0                         | 45.79459                | 0        | 85.10969  |
| 0.333645                  | 67.25598                | 23.77878 | 72.35804  | 0.328627                  | 67.43005                | 21.63545 | 85.10969  |
| 0.559535                  | 79.5144                 | 36.0372  | 72.35804  | 0.49804                   | 84.20396                | 38.40937 | 85.10969  |
| 0.615028                  | 86.87746                | 43.40026 | 72.35804  | 0.599799                  | 96.69656                | 50.90197 | 85.10969  |
| 0.845607                  | 98.22407                | 54.74687 | 72.35804  | 0.756611                  | 108.3678                | 62.57317 | 85.10969  |
| 0.876808                  | 106.7691                | 63.29192 | 72.35804  | 0.874705                  | 118.3998                | 72.60517 | 85.10969  |
|                           | 115.8352                | 72.35804 |           |                           | 130.9043                | 85.10969 |           |

**17.14 W/cm<sup>2</sup>**

**REPLICATE 1**

**REPLICATE 2**

| $(F-F_0)/(F_{tx100}-F_0)$ | average<br>fluorescence | F-F0     | Ftx100-F0 | $(F-F_0)/(F_{tx100}-F_0)$ | average<br>fluorescence | F-F0     | Ftx100-F0 |
|---------------------------|-------------------------|----------|-----------|---------------------------|-------------------------|----------|-----------|
| 0                         | 44.76145                | 0        | 79.0069   | 0                         | 43.2674                 | 0        | 79.31023  |
| 0.584422                  | 83.97957                | 39.21812 | 79.0069   | 0.496389                  | 81.78847                | 38.52107 | 79.31023  |
| 0.807004                  | 97.51025                | 52.7488  | 79.0069   | 0.667648                  | 94.19714                | 50.92975 | 79.31023  |
| 0.989647                  | 106.6726                | 61.91118 | 79.0069   | 0.783617                  | 101.1798                | 57.91237 | 79.31023  |
| 1.013492                  | 115.9783                | 71.21685 | 79.0069   | 0.9014                    | 115.7201                | 72.45272 | 79.31023  |
| 1.100866                  | 117.7647                | 73.00322 | 79.0069   | 0.924011                  | 123.2501                | 79.9827  | 79.31023  |
|                           | 123.7684                | 79.0069  |           |                           | 122.5776                | 79.31023 |           |







**BATCH #6****6.08 W/cm<sup>2</sup>****REPLICATE 1**

| (F-F0)/(Ftx100-F0) | average<br>fluorescence | F-F0     | Ftx100-F0 | (F-F0)/(Ftx100-F0) |
|--------------------|-------------------------|----------|-----------|--------------------|
| 0                  | 43.3042                 | 0        | 64.60409  |                    |
| 0.157494           | 47.22394                | 3.919736 | 64.60409  |                    |
| 0.265107           | 56.27864                | 12.97444 | 64.60409  |                    |
| 0.365198           | 59.97208                | 16.66788 | 64.60409  |                    |
| 0.502091           | 70.09092                | 26.78672 | 64.60409  |                    |
| 0.657917           | 82.50278                | 39.19858 | 64.60409  |                    |
|                    | 107.9083                | 64.60409 |           |                    |

**6.97 W/cm<sup>2</sup>****REPLICATE 1**

| (F-F0)/(Ftx100-F0) | average<br>fluorescence | F-F0     | Ftx100-F0 | (F-F0)/(Ftx100-F0) |
|--------------------|-------------------------|----------|-----------|--------------------|
| 0                  | 41.59651                | 0        | 67.12267  |                    |
| 0.236024           | 54.049                  | 12.45249 | 67.12267  |                    |
| 0.395797           | 61.91244                | 20.31593 | 67.12267  |                    |
| 0.499665           | 66.13666                | 24.54014 | 67.12267  |                    |
| 0.710412           | 80.44814                | 38.85163 | 67.12267  |                    |
| 0.869163           | 92.16948                | 50.57297 | 67.12267  |                    |
|                    | 108.7192                | 67.12267 |           |                    |

**11.83 W/cm<sup>2</sup>****REPLICATE 1****REPLICATE 3**

| (F-F0)/(Ftx100-F0) | average<br>fluorescence | F-F0     | Ftx100-F0 | (F-F0)/(Ftx100-F0) |
|--------------------|-------------------------|----------|-----------|--------------------|
| 0                  | 43.59759                | 0        | 72.62875  | 0                  |
| 0.157494           | 53.23767                | 9.640084 | 72.62875  | 0.132731           |
| 0.265107           | 61.95114                | 18.35356 | 72.62875  | 0.252704           |
| 0.365198           | 69.4361                 | 25.83851 | 72.62875  | 0.355761           |
| 0.502091           | 79.39591                | 35.79833 | 72.62875  | 0.492895           |
| 0.657917           | 95.19794                | 51.60035 | 72.62875  | 0.710467           |
|                    | 116.2263                | 72.62875 |           |                    |

**REPLICATE 3**

| (F-F0)/(Ftx100-F0) | average<br>fluorescence | F-F0     | Ftx100-F0 | (F-F0)/(Ftx100-F0) |
|--------------------|-------------------------|----------|-----------|--------------------|
| 0                  | 44.19769                | 0        | 74.85444  | 0                  |
| 0.236024           | 60.85737                | 16.65968 | 74.85444  | 0.222561           |
| 0.395797           | 73.1581                 | 28.96041 | 74.85444  | 0.38689            |
| 0.499665           | 80.99735                | 36.79966 | 74.85444  | 0.491616           |
| 0.710412           | 93.51949                | 49.3218  | 74.85444  | 0.658903           |
| 0.869163           | 106.106                 | 61.90829 | 74.85444  | 0.827049           |
|                    | 119.0521                | 74.85444 |           |                    |

**REPLICATE 3**

| $(F-F_0)/(F_{tx100}-F_0)$ | average<br>fluorescence | F-F <sub>0</sub> | F <sub>tx100</sub> -F <sub>0</sub> | $(F-F_0)/(F_{tx100}-F_0)$ |
|---------------------------|-------------------------|------------------|------------------------------------|---------------------------|
| 0                         | 44.62796                | 0                | 82.94074                           | 0                         |
| 0.254207                  | 66.93836                | 22.3104          | 82.94074                           | 0.268992                  |
| 0.451293                  | 82.45086                | 37.8229          | 82.94074                           | 0.456023                  |
| 0.598075                  | 94.35078                | 49.72282         | 82.94074                           | 0.599498                  |
| 0.735206                  | 106.0617                | 61.43379         | 82.94074                           | 0.740695                  |
| 0.853078                  | 113.6767                | 69.04874         | 82.94074                           | 0.832507                  |
|                           | 127.5687                | 82.94074         |                                    |                           |

| $(F-F_0)/(F_{tx100}-F_0)$ | average<br>fluorescence | F-F <sub>0</sub> | F <sub>tx100</sub> -F <sub>0</sub> |
|---------------------------|-------------------------|------------------|------------------------------------|
|                           | 35.56324                | 0                | 52.90451                           |
|                           | 48.86932                | 13.30608         | 52.90451                           |
|                           | 57.19724                | 21.634           | 52.90451                           |
|                           | 64.17127                | 28.60802         | 52.90451                           |
|                           | 73.44151                | 37.87827         | 52.90451                           |
|                           | 89.9632                 | 54.39995         | 52.90451                           |
|                           | 88.46775                | 52.90451         |                                    |

17.14 W/cm<sup>2</sup>

| REPLICATE 3               |                         |                  |                                    |                           |
|---------------------------|-------------------------|------------------|------------------------------------|---------------------------|
| $(F-F_0)/(F_{tx100}-F_0)$ | average<br>fluorescence | F-F <sub>0</sub> | F <sub>tx100</sub> -F <sub>0</sub> | $(F-F_0)/(F_{tx100}-F_0)$ |
| 0                         | 41.09503                | 0                | 62.10926                           | 0                         |
| 0.485701                  | 76.83039                | 35.73536         | 62.10926                           | 0.575363                  |
| 0.642159                  | 89.85023                | 48.7552          | 62.10926                           | 0.784991                  |
| 0.730201                  | 96.38641                | 55.29138         | 62.10926                           | 0.890228                  |
| 0.913536                  | 105.7861                | 64.69109         | 62.10926                           | 1.041569                  |
| 1.008479                  | 104.1461                | 63.05104         | 62.10926                           | 1.015163                  |
|                           | 103.2043                | 62.10926         |                                    |                           |

| REPLICATE 1               |                         |                                    |
|---------------------------|-------------------------|------------------------------------|
| $(F-F_0)/(F_{tx100}-F_0)$ | average<br>fluorescence | F <sub>tx100</sub> -F <sub>0</sub> |
|                           | 37.93946                | 0                                  |
|                           | 60.41387                | 22.47441                           |
|                           | 76.90261                | 38.96315                           |
|                           | 85.75647                | 47.81701                           |
|                           | 94.59                   | 56.65055                           |
|                           | 95.81205                | 57.8726                            |
|                           | 102.8214                | 64.88196                           |









| (F-F0)/(Ftx100-F0) | REPLICATE 2             |          |           |                    | REPLICATE 3             |          |           |  |
|--------------------|-------------------------|----------|-----------|--------------------|-------------------------|----------|-----------|--|
|                    | average<br>fluorescence | F-F0     | Ftx100-F0 | (F-F0)/(Ftx100-F0) | average<br>fluorescence | F-F0     | Ftx100-F0 |  |
| 0                  | 37.61647                | 0        | 57.77927  | 0                  | 34.84342                | 0        | 55.29426  |  |
| 0.060673           | 45.73425                | 8.117777 | 57.77927  | 0.140496           | 42.00662                | 7.163192 | 55.29426  |  |
| 0.20083            | 50.97152                | 13.35505 | 57.77927  | 0.231139           | 47.95043                | 13.10701 | 55.29426  |  |
| 0.258              | 55.72084                | 18.10437 | 57.77927  | 0.313337           | 52.53633                | 17.6929  | 55.29426  |  |
| 0.414629           | 63.54629                | 25.92982 | 57.77927  | 0.448774           | 60.15845                | 25.31503 | 55.29426  |  |
| 0.606751           | 74.52286                | 36.90639 | 57.77927  | 0.638748           | 70.96735                | 36.12393 | 55.29426  |  |
|                    | 95.39574                | 57.77927 |           |                    | 90.13768                | 55.29426 |           |  |

| (F-F0)/(Ftx100-F0) | REPLICATE 2             |          |           |                    | REPLICATE 3             |          |           |  |
|--------------------|-------------------------|----------|-----------|--------------------|-------------------------|----------|-----------|--|
|                    | average<br>fluorescence | F-F0     | Ftx100-F0 | (F-F0)/(Ftx100-F0) | average<br>fluorescence | F-F0     | Ftx100-F0 |  |
| 0                  | 40.65362                | 0        | 63.87902  | 0                  | 36.88917                | 0        | 68.59589  |  |
| 0.185518           | 51.68545                | 11.03183 | 63.87902  | 0.172699           | 51.84132                | 14.95215 | 68.59589  |  |
| 0.302669           | 61.27448                | 20.62086 | 63.87902  | 0.322811           | 61.32941                | 24.44023 | 68.59589  |  |
| 0.365601           | 66.81035                | 26.15673 | 63.87902  | 0.409473           | 66.93514                | 30.04596 | 68.59589  |  |
| 0.578815           | 79.07406                | 38.42045 | 63.87902  | 0.601456           | 75.28821                | 38.39904 | 68.59589  |  |
| 0.753441           | 89.62229                | 48.96867 | 63.87902  | 0.766585           | 91.48509                | 54.59592 | 68.59589  |  |
|                    | 104.5326                | 63.87902 |           |                    | 105.4851                | 68.59589 |           |  |

REPLICATE 2

| $(F-F_0)/(F_{tx100}-F_0)$ | average<br>fluorescence | F-F0 | Ftx100-F0 | $(F-F_0)/(F_{tx100}-F_0)$ |
|---------------------------|-------------------------|------|-----------|---------------------------|
|---------------------------|-------------------------|------|-----------|---------------------------|

|          |          |          |          |          |
|----------|----------|----------|----------|----------|
| 0        | 35.57632 | 0        | 60.31479 | 0        |
| 0.251511 | 49.98042 | 14.4041  | 60.31479 | 0.238815 |
| 0.408925 | 60.15002 | 24.57369 | 60.31479 | 0.407424 |
| 0.540748 | 65.97922 | 30.4029  | 60.31479 | 0.50407  |
| 0.715974 | 74.54556 | 38.96924 | 60.31479 | 0.646098 |
| 1.028267 | 83.44777 | 47.87144 | 60.31479 | 0.793693 |
|          | 95.89112 | 60.31479 |          |          |

# REPLICATE 2

| $(F-F_0)/(F_{tx100}-F_0)$ | average<br>fluorescence | F-F0 | Ftx100-F0 | $(F-F_0)/(F_{tx100}-F_0)$ |
|---------------------------|-------------------------|------|-----------|---------------------------|
|---------------------------|-------------------------|------|-----------|---------------------------|

|          |          |          |          |          |
|----------|----------|----------|----------|----------|
| 0        | 36.82464 | 0        | 60.88034 | 0        |
| 0.346389 | 60.42233 | 23.59769 | 60.88034 | 0.387608 |
| 0.600524 | 76.44428 | 39.61963 | 60.88034 | 0.650779 |
| 0.736985 | 84.34924 | 47.5246  | 60.88034 | 0.780623 |
| 0.873132 | 93.41815 | 56.59351 | 60.88034 | 0.929586 |
| 0.891967 | 93.63282 | 56.80817 | 60.88034 | 0.933112 |
|          | 97.70498 | 60.88034 |          |          |









**(F-F0)/(Ftx100-F0)**

|                |
|----------------|
| <hr/>          |
| 0              |
| 0.129547       |
| 0.237041       |
| 0.319977       |
| 0.457824       |
| <hr/> 0.653303 |

**(F-F0)/(Ftx100-F0)**

|                |
|----------------|
| <hr/>          |
| 0              |
| 0.217974       |
| 0.356293       |
| 0.438014       |
| 0.559786       |
| <hr/> 0.795907 |

\_\_\_\_\_

\_\_\_\_\_

\_\_\_\_\_

\_\_\_\_\_
