# Supplementary material for: Effect of pH, ultrasound frequency and power density on the release of calcein from stealth liposomes
Source: publisher site journal article supplement (doi:10.1515/ejnm-2015-0046), 2016-01-01
Supplement: Supplementary file 1 [file Table.doc]

# **SUPPLEMENTARY MATERIAL**

**Table S.1. Final release percentages obtained using 20-kHz, 1-MHz and 3-MHz US at the indicated power densities. The final release at 20 kHz was obtained after 10 min of insonation, while at 1 and 3 MHz was obtained after 60 min.**

| ***pH*** | ***Frequency*** | ***Liposomes*** | ***Power density (W/cm2)*** | ***Percentage release*** |
| --- | --- | --- | --- | --- |
| 5.2 | 20 kHz | non-PEGylated | 6.08  6.97  11.83  17.14 | 74.53±7.56  74.64±4.73  74.50±2.48  87.21±5.36 |
| PEGylated | 6.08  6.97  11.83  17.14 | 71.48±15.09  75.96±9.49  81.81±7.87  88.30±5.82 |
| 7.4 | 20 kHz | non-PEGylated | 6.08  6.97  11.83  17.14 | 86.44±7.43  94.52±8.69  93.20±6.26  97.14±6.76 |
| 20 kHz | PEGylated | 6.08  6.97  11.83  17.14 | 70.76±8.47  77.19±2.17  83.57±6.03  94.91±6.16 |
| 1 MHz | PEGylated | 10.5  18.7  27.6  39.2  50.2 | 4.18±0.15  14.87±0.09  41.34±1.21  48.43±0.49  55.43±1.66 |
| 3 MHz | PEGylated | 50.6  78.5  94.3  158.5  173.3  183 | 4.32±0.16  31.34±2.76  32.71±1.13  60.61±0.91  60.74±0.79  67.04±1.63 |
